# Supplementary material for: The Design Model for Robotic Waitress
Source: Springer Nature journal article supplement (doi:10.1007/s12369-021-00745-1), 2021-01-25
Supplement: MOESM1 [file 18799914]

# Default Report

Ethics and Public Acceptance for Service Robots

August 1, 2020 6:01 AM MDT

Q1 - At present, robots are able to do some simple and repetitive work. Are you worried

that one day your work will be replaced by robots?

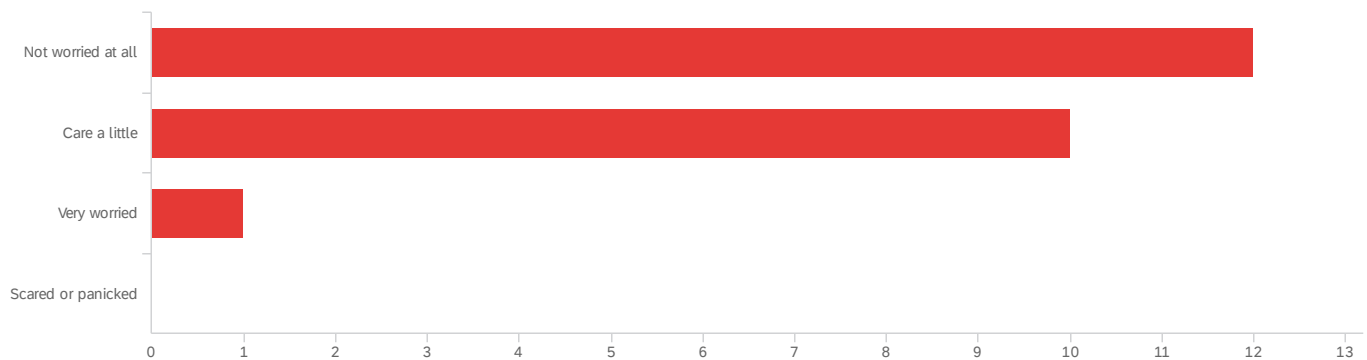

| # | Field                                                                                                                                 | Minimum | Maximum | Mean | Std Deviation | Variance | Count |
|---|---------------------------------------------------------------------------------------------------------------------------------------|---------|---------|------|---------------|----------|-------|
| 1 | At present, robots are able to do some simple and repetitive work. Are you worried that one day your work will be replaced by robots? | 1.00    | 3.00    | 1.52 | 0.58          | 0.34     | 23    |

| # | Field              | Choice Count |
|---|--------------------|--------------|
| 1 | Not worried at all | 52.17% 12    |
| 2 | Care a little      | 43.48% 10    |
| 3 | Very worried       | 4.35% 1      |
| 4 | Scared or panicked | 0.00% 0      |

23

Showing rows 1 - 5 of 5

## Q2 - If one day your colleague is a robot, would you like to work with the robot?

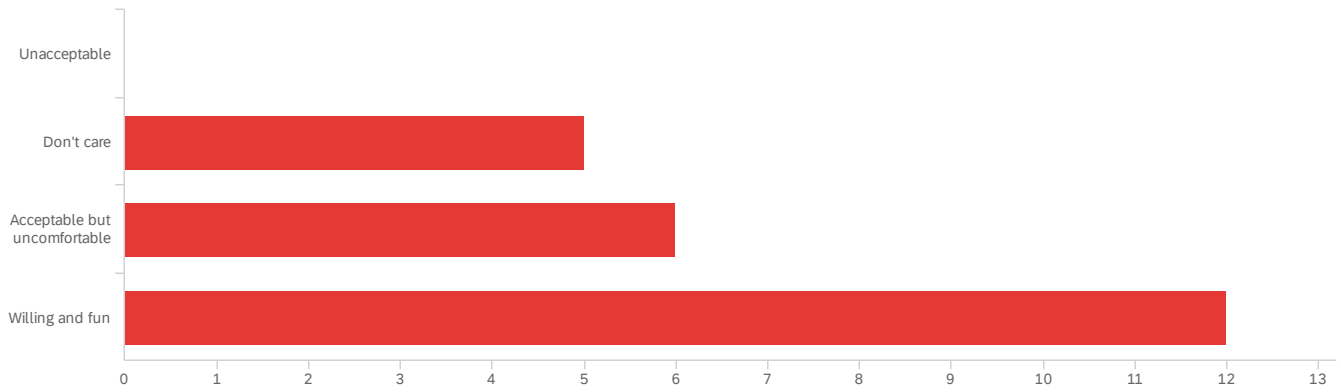

| # | Field                                                                        | Minimum | Maximum | Mean | Std Deviation | Variance | Count |
|---|------------------------------------------------------------------------------|---------|---------|------|---------------|----------|-------|
| 1 | If one day your colleague is a robot, would you like to work with the robot? | 2.00    | 4.00    | 3.30 | 0.80          | 0.65     | 23    |

  

| # | Field                        | Choice Count |
|---|------------------------------|--------------|
| 1 | Unacceptable                 | 0.00% 0      |
| 2 | Don't care                   | 21.74% 5     |
| 3 | Acceptable but uncomfortable | 26.09% 6     |
| 4 | Willing and fun              | 52.17% 12    |

23

Showing rows 1 - 5 of 5

### Q3 - Do you believe that robots with AI (Artificial Intelligence) capabilities can work more efficiently and accurately?

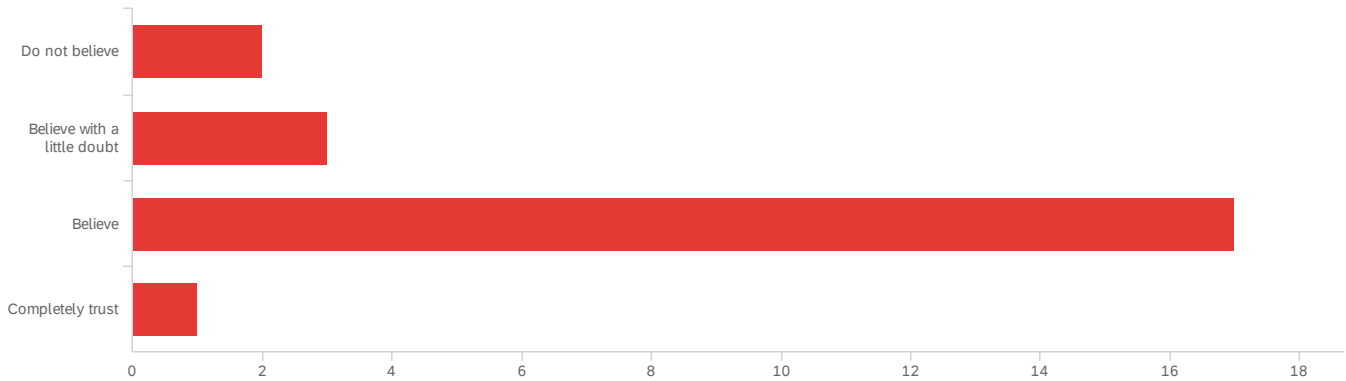

| # | Field                                                                                                               | Minimum | Maximum | Mean | Std Deviation | Variance | Count |
|---|---------------------------------------------------------------------------------------------------------------------|---------|---------|------|---------------|----------|-------|
| 1 | Do you believe that robots with AI (Artificial Intelligence) capabilities can work more efficiently and accurately? | 1.00    | 4.00    | 2.74 | 0.67          | 0.45     | 23    |

| # | Field                       | Choice Count |
|---|-----------------------------|--------------|
| 1 | Do not believe              | 8.70% 2      |
| 2 | Believe with a little doubt | 13.04% 3     |
| 3 | Believe                     | 73.91% 17    |
| 4 | Completely trust            | 4.35% 1      |

23

Showing rows 1 - 5 of 5

## Q4 - If the robot made a mistake at work (e.g. cafe or reception area), can you tolerate it?

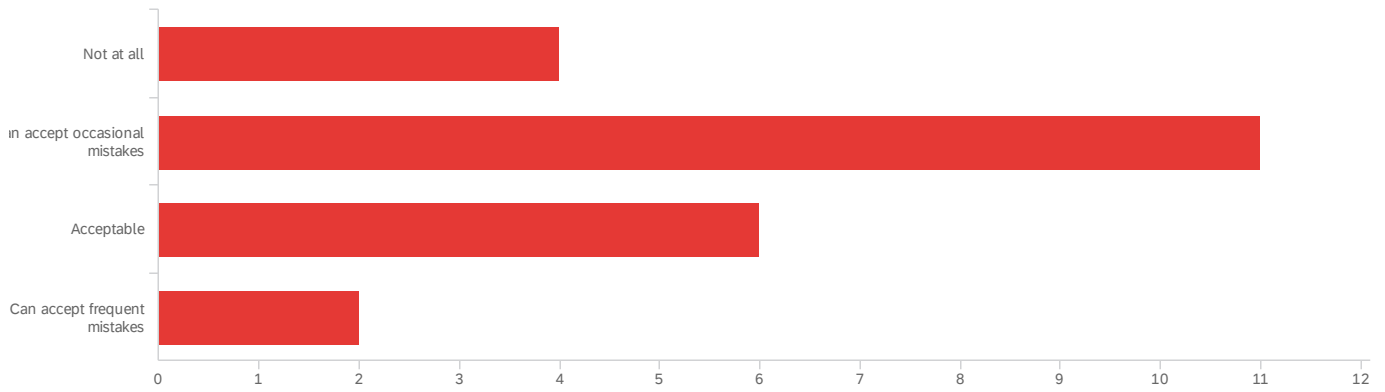

| # | Field                                                                                   | Minimum | Maximum | Mean | Std Deviation | Variance | Count |
|---|-----------------------------------------------------------------------------------------|---------|---------|------|---------------|----------|-------|
| 1 | If the robot made a mistake at work (e.g. cafe or reception area), can you tolerate it? | 1.00    | 4.00    | 2.26 | 0.85          | 0.71     | 23    |

| # | Field                          | Choice Count |
|---|--------------------------------|--------------|
| 1 | Not at all                     | 17.39% 4     |
| 2 | Can accept occasional mistakes | 47.83% 11    |
| 3 | Acceptable                     | 26.09% 6     |
| 4 | Can accept frequent mistakes   | 8.70% 2      |

23

Showing rows 1 - 5 of 5

# Q5 - Do you mind if the manager of company collects your data by using service robotic waitress?

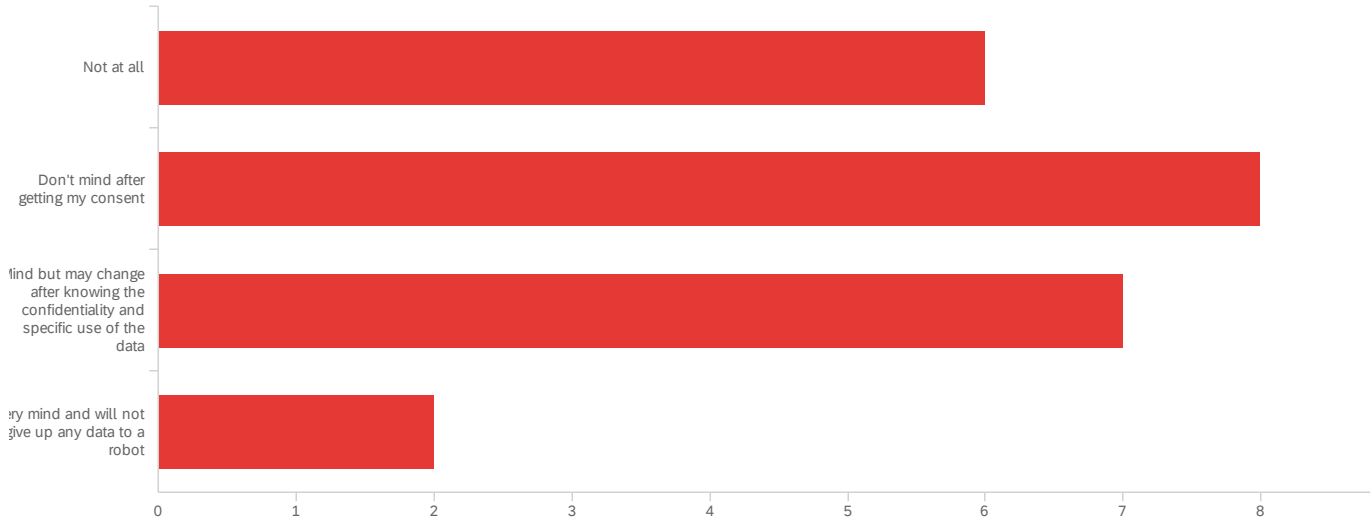

| # | Field                                                                                       | Minimum | Maximum | Mean | Std Deviation | Variance | Count |
|---|---------------------------------------------------------------------------------------------|---------|---------|------|---------------|----------|-------|
| 1 | Do you mind if the manager of company collects your data by using service robotic waitress? | 1.00    | 4.00    | 2.22 | 0.93          | 0.87     | 23    |

| # | Field                                                                              | Choice Count |
|---|------------------------------------------------------------------------------------|--------------|
| 1 | Not at all                                                                         | 26.09% 6     |
| 2 | Don't mind after getting my consent                                                | 34.78% 8     |
| 3 | Mind but may change after knowing the confidentiality and specific use of the data | 30.43% 7     |
| 4 | Very mind and will not give up any data to a robot                                 | 8.70% 2      |

23

Showing rows 1 - 5 of 5

## Q6 - Are you worried that someone will steal your data from the robot?

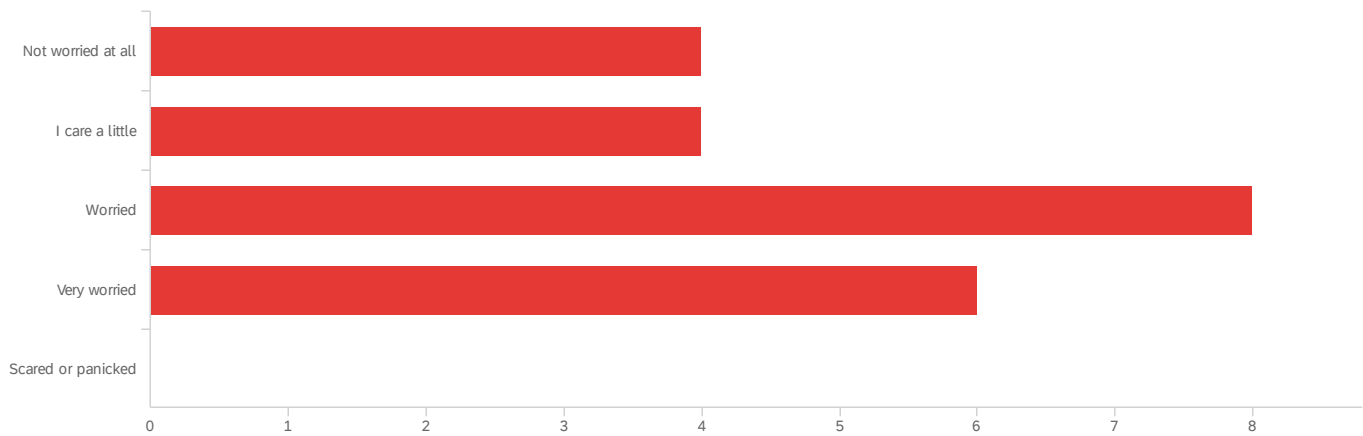

| # | Field                                                             | Minimum | Maximum | Mean | Std Deviation | Variance | Count |
|---|-------------------------------------------------------------------|---------|---------|------|---------------|----------|-------|
| 1 | Are you worried that someone will steal your data from the robot? | 1.00    | 4.00    | 2.73 | 1.05          | 1.11     | 22    |

| # | Field              | Choice Count |
|---|--------------------|--------------|
| 1 | Not worried at all | 18.18% 4     |
| 2 | I care a little    | 18.18% 4     |
| 3 | Worried            | 36.36% 8     |
| 4 | Very worried       | 27.27% 6     |
| 5 | Scared or panicked | 0.00% 0      |
|   |                    | 22           |

Showing rows 1 - 6 of 6

Q7 - If the robot made a mistake while recognising you as a returning visitor / customer, can you bear it?

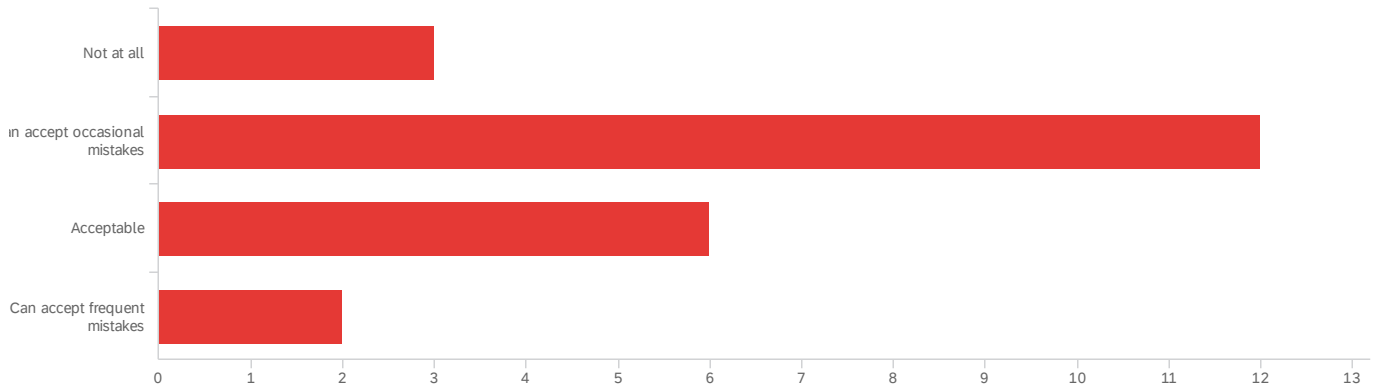

| # | Field                                                                                                 | Minimum | Maximum | Mean | Std Deviation | Variance | Count |
|---|-------------------------------------------------------------------------------------------------------|---------|---------|------|---------------|----------|-------|
| 1 | If the robot made a mistake while recognising you as a returning visitor / customer, can you bear it? | 1.00    | 4.00    | 2.30 | 0.80          | 0.65     | 23    |

| # | Field                          | Choice Count |
|---|--------------------------------|--------------|
| 1 | Not at all                     | 13.04% 3     |
| 2 | Can accept occasional mistakes | 52.17% 12    |
| 3 | Acceptable                     | 26.09% 6     |
| 4 | Can accept frequent mistakes   | 8.70% 2      |

23

Showing rows 1 - 5 of 5

## Q8 - Can you tolerate the robot's inability to recognize your voice commands in noisy environments?

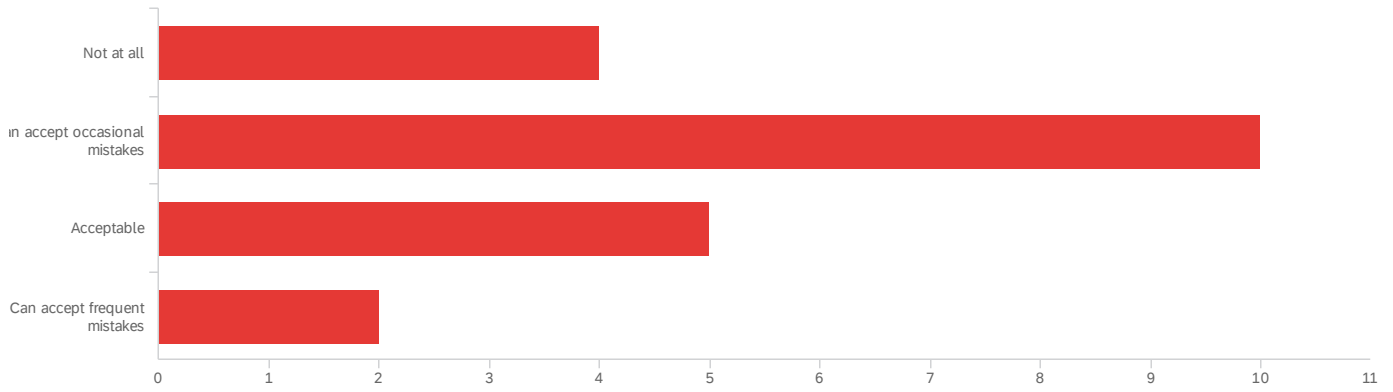

| # | Field                                                                                          | Minimum | Maximum | Mean | Std Deviation | Variance | Count |
|---|------------------------------------------------------------------------------------------------|---------|---------|------|---------------|----------|-------|
| 1 | Can you tolerate the robot's inability to recognize your voice commands in noisy environments? | 1.00    | 4.00    | 2.24 | 0.87          | 0.75     | 21    |

| # | Field                          | Choice Count |
|---|--------------------------------|--------------|
| 1 | Not at all                     | 19.05% 4     |
| 2 | Can accept occasional mistakes | 47.62% 10    |
| 3 | Acceptable                     | 23.81% 5     |
| 4 | Can accept frequent mistakes   | 9.52% 2      |

21

Showing rows 1 - 5 of 5



Q9 - Would you mind to wear a headset or mic to chat with a humanoid robot so that it can recognise your spoken words better?

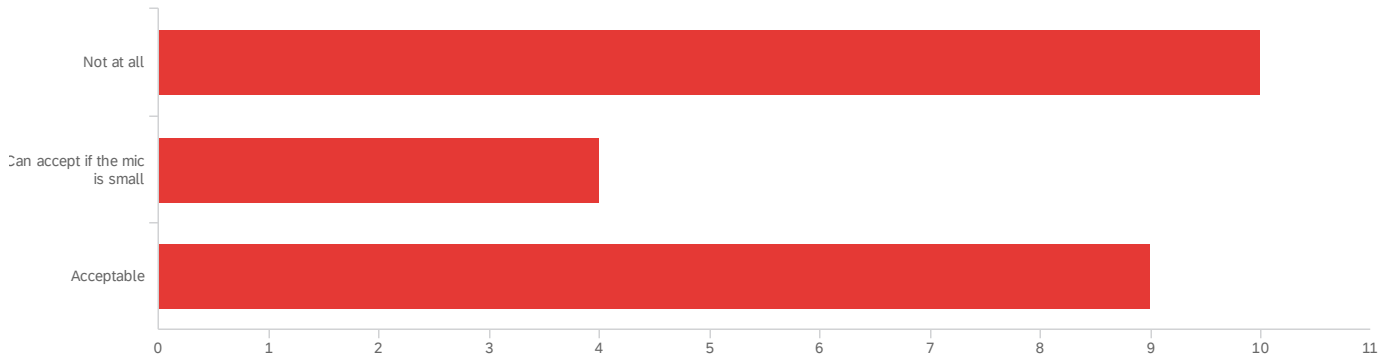

| # | Field                                                                                                                    | Minimum | Maximum | Mean | Std Deviation | Variance | Count |
|---|--------------------------------------------------------------------------------------------------------------------------|---------|---------|------|---------------|----------|-------|
| 1 | Would you mind to wear a headset or mic to chat with a humanoid robot so that it can recognise your spoken words better? | 1.00    | 3.00    | 1.96 | 0.91          | 0.82     | 23    |

| # | Field                          | Choice Count |
|---|--------------------------------|--------------|
| 1 | Not at all                     | 43.48% 10    |
| 2 | Can accept if the mic is small | 17.39% 4     |
| 3 | Acceptable                     | 39.13% 9     |
|   |                                | 23           |

Showing rows 1 - 4 of 4

**End of Report**
